# Supplementary material for: Risk of Prediabetes and Diabetes in Oral Lichen Planus: A Case–Control Study according to Current Diagnostic Criteria
Source: Diagnostics (Basel). 2023 Apr 28;13(9):1586. doi: 10.3390/diagnostics13091586 (PMC10178478; doi:10.3390/diagnostics13091586)
Supplement: Supplementary file 1 [file diagnostics-13-01586-s001.zip › diagnostics-2322356-supplementary.pdf]

Table S1. Annex I. STROBE Statement—Checklist of items that should be included in reports of case-control studies

|                          | Item No | Recommendation                                                                                                                                                                       | Page No |
|--------------------------|---------|--------------------------------------------------------------------------------------------------------------------------------------------------------------------------------------|---------|
| Title and abstract       | 1       | (a) Indicate the study’s design with a commonly used term in the title or the abstract                                                                                               | 1       |
|                          |         | (b) Provide in the abstract an informative and balanced summary of what was done and what was found                                                                                  | 1       |
| Introduction             |         |                                                                                                                                                                                      |         |
| Background/rationale     | 2       | Explain the scientific background and rationale for the investigation being reported                                                                                                 | 1, 2    |
| Objectives               | 3       | State specific objectives, including any prespecified hypotheses                                                                                                                     | 2       |
| Methods                  |         |                                                                                                                                                                                      |         |
| Study design             | 4       | Present key elements of study design early in the paper                                                                                                                              | 2       |
| Setting                  | 5       | Describe the setting, locations, and relevant dates, including periods of recruitment, exposure, follow-up, and data collection                                                      | 2       |
| Participants             | 6       | (a) Give the eligibility criteria, and the sources and methods of selection of participants                                                                                          | 2       |
| Variables                | 7       | Clearly define all outcomes, exposures, predictors, potential confounders, and effect modifiers. Give diagnostic criteria, if applicable                                             | 2,3     |
| Data sources/measurement | 8*      | For each variable of interest, give sources of data and details of methods of assessment (measurement). Describe comparability of assessment methods if there is more than one group | 2,3     |
| Bias                     | 9       | Describe any efforts to address potential sources of bias                                                                                                                            | 3       |
| Study size               | 10      | Explain how the study size was arrived at                                                                                                                                            | 2       |
| Quantitative variables   | 11      | Explain how quantitative variables were handled in the analyses. If applicable, describe which groupings were chosen and why                                                         | 2,3     |
| Statistical methods      | 12      | (a) Describe all statistical methods, including those used to control for confounding                                                                                                | 3       |
|                          |         | (b) Describe any methods used to examine subgroups and interactions                                                                                                                  | 3       |
|                          |         | (c) Explain how missing data were addressed                                                                                                                                          |         |
|                          |         | (d) If applicable, describe analytical methods taking account of sampling strategy                                                                                                   |         |

|                                       |     |                                                                                                                                                                                                              |                               |
|---------------------------------------|-----|--------------------------------------------------------------------------------------------------------------------------------------------------------------------------------------------------------------|-------------------------------|
| (e) Describe any sensitivity analyses |     |                                                                                                                                                                                                              |                               |
| <b>Results</b>                        |     |                                                                                                                                                                                                              |                               |
| Participants                          | 13* | (a) Report numbers of individuals at each stage of study—eg numbers potentially eligible, examined for eligibility, confirmed eligible, included in the study, completing follow-up, and analysed            | 3,4. Table1                   |
|                                       |     | (b) Give reasons for non-participation at each stage                                                                                                                                                         |                               |
|                                       |     | (c) Consider use of a flow diagram                                                                                                                                                                           |                               |
| Descriptive data                      | 14* | (a) Give characteristics of study participants (eg demographic, clinical, social) and information on exposures and potential confounders                                                                     | 4-6<br>Table 2,3              |
|                                       |     | (b) Indicate number of participants with missing data for each variable of interest                                                                                                                          |                               |
| Outcome data                          | 15* | Report numbers of outcome events or summary measures                                                                                                                                                         | 4                             |
| Main results                          | 16  | (a) Give unadjusted estimates and, if applicable, confounder-adjusted estimates and their precision (eg, 95% confidence interval). Make clear which confounders were adjusted for and why they were included | 4-7<br>Table 2-4              |
|                                       |     | (b) Report category boundaries when continuous variables were categorized                                                                                                                                    |                               |
|                                       |     | (c) If relevant, consider translating estimates of relative risk into absolute risk for a meaningful time period                                                                                             |                               |
| Other analyses                        | 17  | Report other analyses done—eg analyses of subgroups and interactions, and sensitivity analyses                                                                                                               | 4-7<br>Table 2-4<br>Appendix2 |
| <b>Discussion</b>                     |     |                                                                                                                                                                                                              |                               |
| Key results                           | 18  | Summarise key results with reference to study objectives                                                                                                                                                     | 7                             |
| Limitations                           | 19  | Discuss limitations of the study, taking into account sources of potential bias or imprecision. Discuss both direction and magnitude of any potential bias                                                   | 8                             |
| Interpretation                        | 20  | Give a cautious overall interpretation of results considering objectives, limitations, multiplicity of analyses, results from similar studies, and other relevant evidence                                   | 8,9                           |
| Generalisability                      | 21  | Discuss the generalisability (external validity) of the study results                                                                                                                                        | 7,8                           |
| <b>Other information</b>              |     |                                                                                                                                                                                                              |                               |
| Funding                               | 22  | Give the source of funding and the role of the funders for the present study and, if applicable, for the original study on which the present article is based                                                | No funding                    |
